# Supplementary figures and images for: Heart failure development in obesity: underlying risk factors and mechanistic pathways
Source: PubMed Central journal article supplement — ESC Heart Fail. 2020 Nov 24;8(1):356–67. doi: 10.1002/ehf2.13081 (PMC7835624; doi:10.1002/ehf2.13081), 2020-11-24

## Women

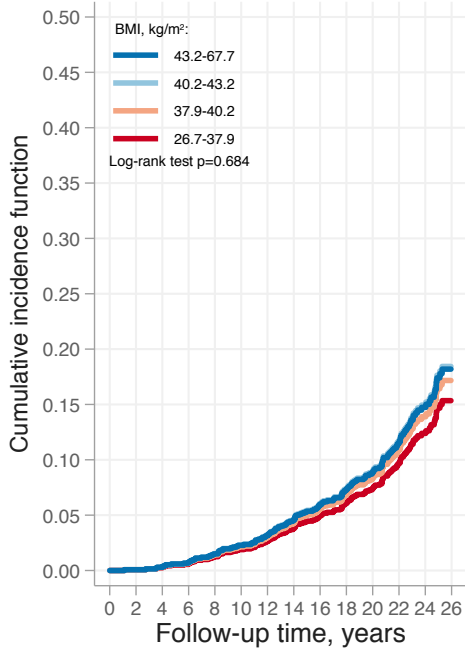

## Men

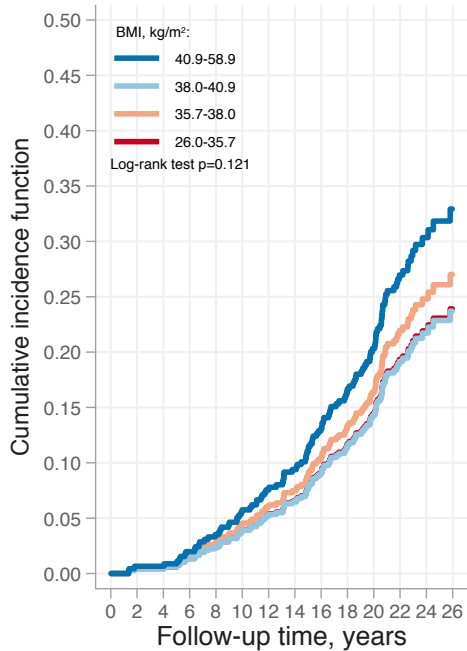

Supplement: EHF2-8-356-s001.pdf [file EHF2-8-356-s001.pdf]
